# Supplementary material for: Piper nigrum CYP719A37 Catalyzes the Decisive Methylenedioxy Bridge Formation in Piperine Biosynthesis
Source: MDPI journal article supplement (doi:10.3390/plants10010128), 2021-01-09
Supplement: s1 [file s1]

## Supplemental Material

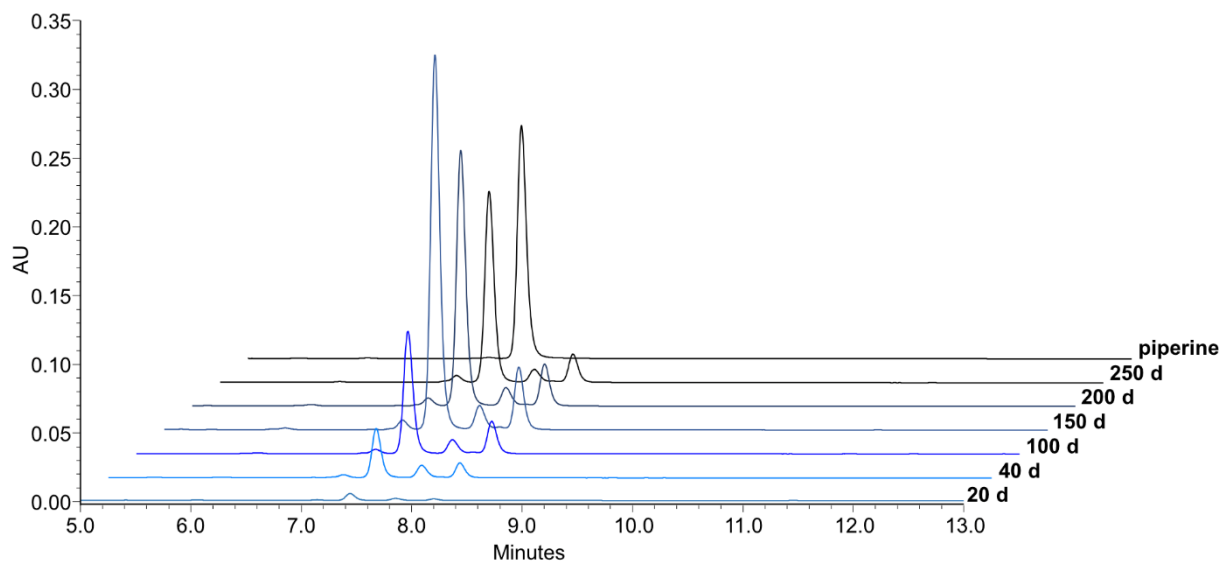

**Figure S1** Accumulation of piperine during fruit development of black pepper. 5  $\mu$ l of a 10 mg/ml 90% MeOH extracted fresh fruits were analysed by LC-MS and product formation recorded at 340 nm. Days post anthesis are marked.

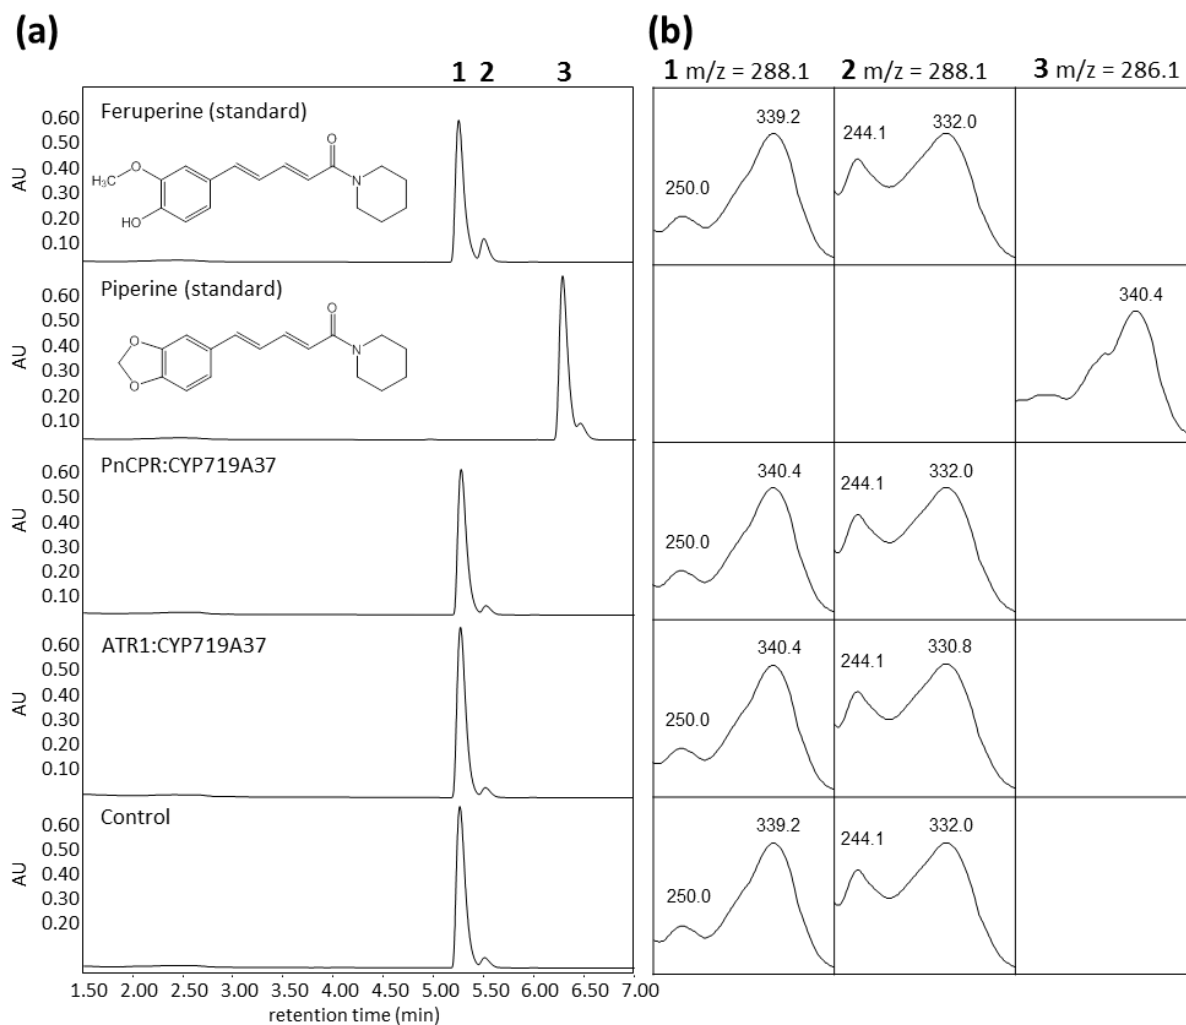

**Figure S2** Microsomes from *CYP719A37*-transformed yeast were incubated with 100  $\mu$ M feruperine (1) and its isomer side product (2) for up to 24 hours (shown). No product formation (piperine, 3) was observed, neither with co-transformed reductases, ATR1 nor with PnCPR1. Corresponding UV-spectra are shown on the right. Piperine and empty vector controls are also shown.

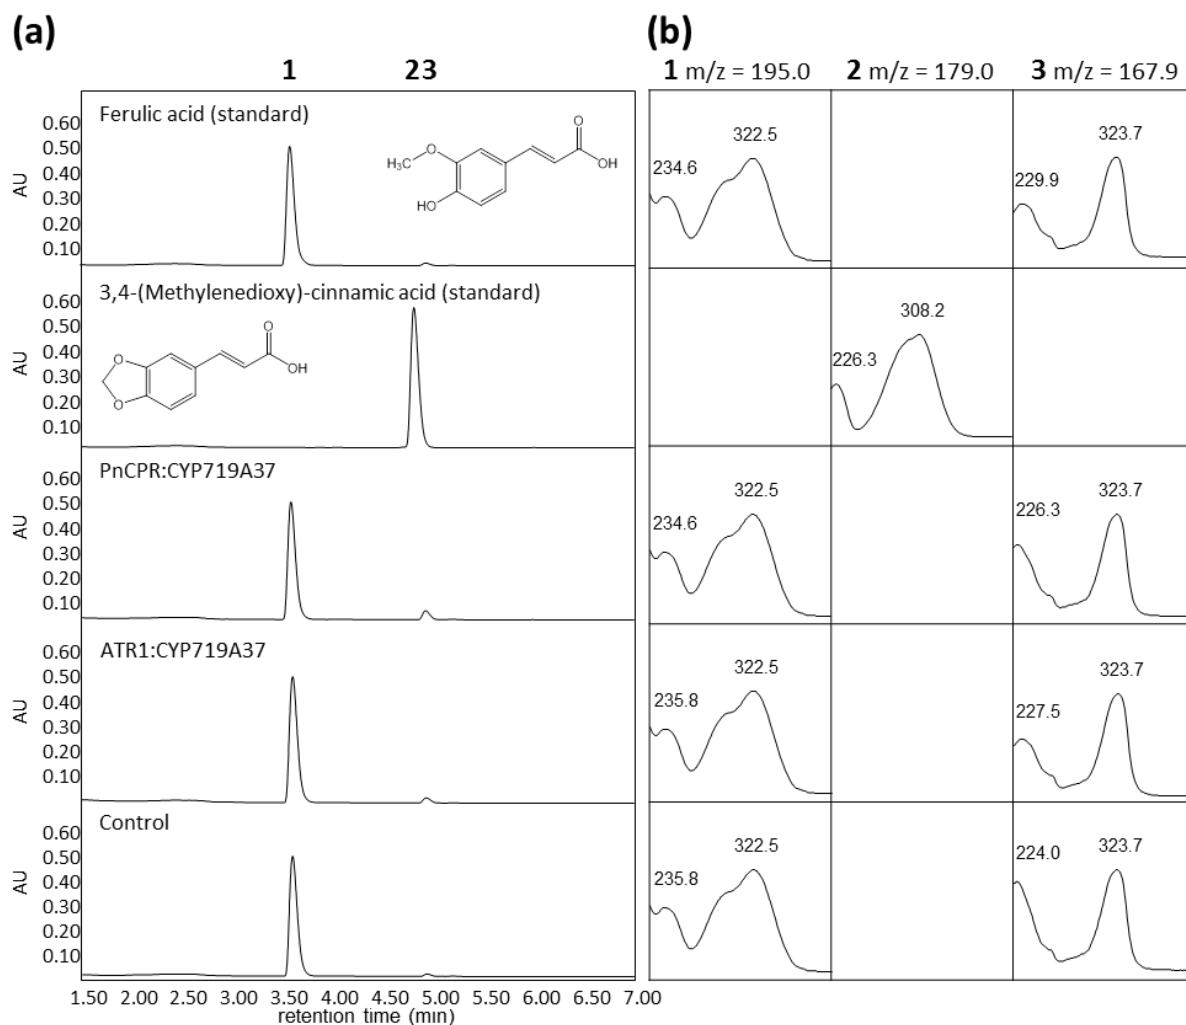

**Figure S3** Microsomes from CYP719A37-transformed yeast were incubated with 100  $\mu$ M ferulic acid (1) for up to 24 hours (shown). No product formation (3,4-methylenedioxy cinnamic acid, 2) was observed, neither with co-transformed reductases, ATR1 nor with PnCPR1. Corresponding UV-spectra are shown on the right. The minor compound (3) is also detected in the standard and is not identical to the expected product. Ferulic acid and empty vector controls are also shown.

|                 |       | membrane-anchored region |             |            |            |             |             |            |       |       |       |       |    |       |       |       |       |
|-----------------|-------|--------------------------|-------------|------------|------------|-------------|-------------|------------|-------|-------|-------|-------|----|-------|-------|-------|-------|
| CYP719A37       | (Pni) | -----M                   | EQAQWVDPAL  | FSAFVSIIEF | FLGMFLGRIS | LGVGKGAAPR  | SPSSTEWFDG  |            |       |       |       |       |    |       |       |       |       |
| CYP719A26       | (Pme) | -----M                   | EQAQWVDPAL  | LPAFVGIIEF | FLGMFFGRSS | LGAGKGAAPR  | STSSTEWFDG  |            |       |       |       |       |    |       |       |       |       |
| CYP719A1        | (Cja) | -----MEMN                | PLLVCATVAI  | VFATTTIIRI | LF-----    | -----SSS    | SLPQMKWESG  |            |       |       |       |       |    |       |       |       |       |
| CYP719A5        | (Eca) | -----M                   | EESLWVVTAT  | VVVVFAIAKL | LK-----    | -----KSS    | SISTMEWPKG  |            |       |       |       |       |    |       |       |       |       |
| pCYP77A2        | (Atr) | -----                    | -MALLYLFSI  | LSALLFCYLF | LS-----    | -----SR     | KTKALKLFPG  |            |       |       |       |       |    |       |       |       |       |
| CYP77A4         | (Ath) |                          | MFPLISFSPT  | SLDFTFFAII | ISGFVFIIR  | WN-----     | -----SN     | SKKRLNLEPG |       |       |       |       |    |       |       |       |       |
|                 |       |                          |             |            |            |             |             |            |       |       | : * * |       |    |       |       |       |       |
| CYP719A37       | (Pni) |                          | PPKLPIIGNL  | HQLNKGGLV  | HHKLAKLAQS | YDRAMTIWVG  | SWGPMIVVSD  | ADLAWEVLVT |       |       |       |       |    |       |       |       |       |
| CYP719A26       | (Pme) |                          | PPKLPIIGNL  | HQLNKGGLV  | HHNLAKLAQS | YDRAMTIWVG  | SWGPMIVVSD  | ADLAWEVLVT |       |       |       |       |    |       |       |       |       |
| CYP719A1        | (Cja) |                          | PRKLPIIGNL  | HQLG--DDVL | HVALAKLAKV | HGSVMTIWIW  | SWRPVIVISD  | IEKAWEVLVN |       |       |       |       |    |       |       |       |       |
| CYP719A5        | (Eca) |                          | PKKLPIIGNL  | HQLG--GEAF | HVVLANLAKI | HGTVMTIWIW  | AWRPVIVISD  | IDKAWEVLVN |       |       |       |       |    |       |       |       |       |
| pCYP77A2        | (Atr) |                          | PKGWPLVGNL  | LQIARSGKPF | VFIVNELSQK | YGPIFTLKMG  | AR-TLIVISS  | AELAHEALIQ |       |       |       |       |    |       |       |       |       |
| CYP77A4         | (Ath) |                          | PPGWVFNGL   | QQFARSGKPF | FEYAEDLTKT | YGPIFTLRMG  | TR-TMIILSD  | ATLVHEALIQ |       |       |       |       |    |       |       |       |       |
|                 |       |                          | *           | :::***     | *          | :           | ..          | .          | *     | :     | ..    | ::*:* | :  | ..    | ::*:* | .     | ::*:* |
| CYP719A37       | (Pni) |                          | KSPDFAGRVL  | SKLS-HLFNA | DYNTVVAYDA | GPQWQSLRRG  | LQHGPLGPAH  | VSAQARFHEE |       |       |       |       |    |       |       |       |       |
| CYP719A26       | (Pme) |                          | KSPDFAGRVL  | SKLS-HLFNA | NYNTVVAYDA | GPQWQSLRRG  | LQHGPLGPAH  | VSAQARFHEE |       |       |       |       |    |       |       |       |       |
| CYP719A1        | (Cja) |                          | KSADYGARM   | PEIT-KIASA | SWHTISTSDA | GSFQNVVRKG  | LQSGAMGPLN  | VAAQNYQYQR |       |       |       |       |    |       |       |       |       |
| CYP719A5        | (Eca) |                          | KSSDYAGRDF  | PEIT-KIISA | NWKNISCSDS | GPFWQNLKRG  | LQSGALAPLN  | VISQYQLQER |       |       |       |       |    |       |       |       |       |
| pCYP77A2        | (Atr) |                          | KGQTFANRPA  | ETPTRAIFSS | HKKTVNSAEY | GPLWRSLLRN  | MVQGMILTPAK | LRAFRPIRRK |       |       |       |       |    |       |       |       |       |
| CYP77A4         | (Ath) |                          | RGALFASRPA  | ENPRTTIFSC | NKFTVNAAKY | GPVWRSLLRN  | MVQNMLSSTR  | LKEFGKLRQS |       |       |       |       |    |       |       |       |       |
|                 |       |                          | ..          | :: *       | :          | ..          | .           | *          | ::*:* | :     | ..    | ::*:* | :  | ..    | ::*:* |       |       |
| CYP719A37       | (Pni) |                          | DMKLLVSDMM  | RAAKKGGNG  | VVEPLAYVRR | ATIRFLSRLC  | FGEAFNDEAF  | VEGMDEAVEE |       |       |       |       |    |       |       |       |       |
| CYP719A26       | (Pme) |                          | DMKLLVSDMM  | RAAQKGGNG  | VVEPLAYVRR | ATIRFLSRLC  | FGEAFNDEAF  | VEGMDEAVEE |       |       |       |       |    |       |       |       |       |
| CYP719A1        | (Cja) |                          | DMKRLIKAMS  | DEAAN--NNG | IVKPLDHKK  | NTVRLTLRLI  | FGQAFDDNKF  | IESMHYIED  |       |       |       |       |    |       |       |       |       |
| CYP719A5        | (Eca) |                          | DMKNLITSMQ  | EKASK--NNG | ILKPLDYLKE | ETIRLLSRLI  | FGQSFNDENF  | VKGVHLALDD |       |       |       |       |    |       |       |       |       |
| pCYP77A2        | (Atr) |                          | ALDKLVERLA  | AESKS---G  | LVRVLSNCRF | TVFRILLCMC  | FGVEMDENMI  | EKVDVSLKVV |       |       |       |       |    |       |       |       |       |
| CYP77A4         | (Ath) |                          | AMDKLIERTK  | SEARDN--DG | LIWVLKNARF | AAFCILLEMC  | FGIEMDEETI  | EKMDEILKTV |       |       |       |       |    |       |       |       |       |
|                 |       |                          | ..          | ::*:       | :          | ..          | ::*:        | *          | ::*:  | *     | ::*:  | ::*:  | :  | ..    | ::*:  |       |       |
| CYP719A37       | (Pni) |                          | TIRATG----  | HARILDAFYF | TRHLPRIIRS | FMNTVAAKKK  | IESLVRPLLS  | ----RPAPPG |       |       |       |       |    |       |       |       |       |
| CYP719A26       | (Pme) |                          | TIGATG----  | HARILDAFYF | TRHLPRIIRS | FIDTVNAKKK  | IESLVRPLLS  | ----RPAPPG |       |       |       |       |    |       |       |       |       |
| CYP719A1        | (Cja) |                          | IIRISG----  | YARLAEAFFY | AKYLPSHKKA | EREAFVVKCR  | VEELVRPLLS  | ----SKPPTN |       |       |       |       |    |       |       |       |       |
| CYP719A5        | (Eca) |                          | LVRISG----  | YASLADAFKF | CENLPSHKKS | IREVHEVNER  | VVNLVKPYLV  | ----KNPPTN |       |       |       |       |    |       |       |       |       |
| pCYP77A2        | (Atr) |                          | LITTLEPRIDD | FLPILQAFV  | KKVAHAKHVR | KEQLETLPLL  | IRSRKKTIQN  | ----AMSAPF |       |       |       |       |    |       |       |       |       |
| CYP77A4         | (Ath) |                          | LMTVDPRIDD  | YLPILAPFFS | KERKRALEVR | REQVDYVVG   | IERRRAIQN   | PGSDKTASSF |       |       |       |       |    |       |       |       |       |
|                 |       |                          | :           | ..         | :          | ..          | :           | ..         | :     | ..    | :     | ..    | :  | ..    | :     |       |       |
| CYP719A37       | (Pni) |                          | SYLHFLSLTD  | AP-----E   | SMIIFRIFEV | YLGVDSTAS   | TTTWALAFLV  | SNQQAQEKLH |       |       |       |       |    |       |       |       |       |
| CYP719A26       | (Pme) |                          | SYLHFLSLTD  | AP-----E   | NMIIFRIFEV | YLGVDSTAS   | TTTWALAFLV  | SNQQAQEKLH |       |       |       |       |    |       |       |       |       |
| CYP719A1        | (Cja) |                          | SYLYFLLSQN  | FE-----E   | EVIIFCIFEI | YLGVDSTSS   | TTTWALAYLI  | REQGAQEKLY |       |       |       |       |    |       |       |       |       |
| CYP719A5        | (Eca) |                          | TYLYFLLSQK  | FS-----D   | EVIISAVLEV | YLGVDSTAS   | TAVWALTFLV  | REPRVQEKLY |       |       |       |       |    |       |       |       |       |
| pCYP77A2        | (Atr) |                          | AYIDSLFDLD  | MG--QGPPE  | DMLVTLCAEF | LNCGTDATAT  | AVEWAMAHLV  | ADSEIQTRVR |       |       |       |       |    |       |       |       |       |
| CYP77A4         | (Ath) |                          | SYLDTLFDLK  | IEGRKTPPSN | EELVTLCESE | LNCGTDATGT  | AIEWGIAQLI  | ANPEIQSRLY |       |       |       |       |    |       |       |       |       |
|                 |       |                          | ::*         | * ..       | :          | ..          | *           | ::*:*      | :     | ..    | ::*:* | :     | .. | ::*:* | :     | ..    |       |
| CYP719A37       | (Pni) |                          | NELAQYCASQ  | NNQNIKAEDV | GKLSYLLGVV | KETMRMKPIA  | PLAVPHKTLK  | ETMLDGKRVV |       |       |       |       |    |       |       |       |       |
| CYP719A26       | (Pme) |                          | NELAQYCASQ  | NNQIIKADDV | GKLSYLLGVV | KETMRMKPIA  | PLAVPHKTLK  | ETMLDGKRVV |       |       |       |       |    |       |       |       |       |
| CYP719A1        | (Cja) |                          | QDIRMTLGDV  | D--LVKIEDV | NKLYLQGVV  | KETMRMKPIA  | PLAIPHKTAK  | ETTLMTGKVA |       |       |       |       |    |       |       |       |       |
| CYP719A5        | (Eca) |                          | KEIIDLTGGE  | R--SVKVEDV | SKLEYLQAVM | KETMRMKPIA  | PMAIPHKTSR  | DTSLMGKVVN |       |       |       |       |    |       |       |       |       |
| pCYP77A2        | (Atr) |                          | AEIDR-VSPD  | H--RVNDEDV | EKMEYLQAFV | KETLRKHPEPT | YFLLTHAVTE  | KSLGGYDIP  |       |       |       |       |    |       |       |       |       |
| CYP77A4         | (Ath) |                          | DEIKSTVGDD  | R--RVDEKDV | DKMVFLOAFV | KELLRKHPEPT | YFSLTHAVME  | TTTLGAYDIP |       |       |       |       |    |       |       |       |       |
|                 |       |                          | ::          | .          | :          | ..**        | *           | ::*:*      | *     | ::*:* | *     | ::*:* | :  | ..*   | .     | ::*:* |       |
| CYP719A37       | (Pni) |                          | AGTTVVVNLV  | AVHYNPKLWP | EPEQFRPERF | VIGASGGNGG  | GSSEYMLQSY  | LPFGGMRAC  |       |       |       |       |    |       |       |       |       |
| CYP719A26       | (Pme) |                          | AGTTVVVNLV  | AVHYNPKLWP | EPEQFRPERF | VVGASGGNGG  | GSSEYMLQSY  | LPFGGMRSC  |       |       |       |       |    |       |       |       |       |
| CYP719A1        | (Cja) |                          | KGTRIMVNLV  | ALHNNQNIWP | DPYKFMPERF | LEG---ETGT  | AYNKAMEQSF  | LPFSAGMRIC |       |       |       |       |    |       |       |       |       |
| CYP719A5        | (Eca) |                          | KGTSIMVNLV  | AIHNNPKVFP | EPYKFIPERF | LQQG--ESKY  | GDIKEMEQLS  | LPFSAGMRIC |       |       |       |       |    |       |       |       |       |
| pCYP77A2        | (Atr) |                          | EGVNVDFYTP  | SISDDPKLWG | DPERFRPERF | VDKMDGDDDA  | DLTGKVGKVM  | MPFGVGRRIC |       |       |       |       |    |       |       |       |       |
| CYP77A4         | (Ath) |                          | AGVNVVEYLP  | GISEDPRINW | NPKKFDPRDF | MLGKE---DA  | DITGISGVKM  | IPFGVGRRIC |       |       |       |       |    |       |       |       |       |
|                 |       |                          | *           | ..         | :          | ..**        | *           | ::*:*      | *     | ::*:* | *     | ::*:* | :  | ..*   | .     | ::*:* |       |
| CYP719A37       | (Pni) |                          | AGMEVGKLVQ  | AMVVANLVMS | FKWLPEAEGK | MPDLAEDMTF  | VLMKKPLAA   | KIVPRA--   |       |       |       |       |    |       |       |       |       |
| CYP719A26       | (Pme) |                          | AGMEVGKLVQ  | AMVVANLVMA | FKWLPEEEGK | MPDLAEDMTF  | VLMKKPLAA   | KIVPRA--   |       |       |       |       |    |       |       |       |       |
| CYP719A1        | (Cja) |                          | AGMDLGLKQF  | AFALANLVNA | FKWSCVEEGK | LPDMGELSFS  | VLLMKTPLAA  | RIAGRNV--  |       |       |       |       |    |       |       |       |       |
| CYP719A5        | (Eca) |                          | AGMELGLKQY  | GFSLASLVEA | FKWTCVADGK | LPDLSEDHCF  | ILLMKNPLEA  | RITPRTQL   |       |       |       |       |    |       |       |       |       |
| pCYP77A2        | (Atr) |                          | PGLGLGMLHI  | SIMVATMVQQ | FEWLPNPVAV | RVIDMSEKFEF | TVLMKTPLLA  | IAQPRKK--  |       |       |       |       |    |       |       |       |       |
| CYP77A4         | (Ath) |                          | PGLAMATIHV  | HLMLARMVQE | FEWCAHPGGS | EIDFAGKLEF  | TVVMKNPLRA  | MVKPRI--   |       |       |       |       |    |       |       |       |       |
|                 |       |                          | ::*         | ..         | :          | ..**        | *           | ::*:*      | *     | ::*:* | *     | ::*:* | :  | ..*   | .     | ::*:* |       |
| aromatic region |       |                          |             |            |            |             |             |            |       |       |       |       |    |       |       |       |       |
| CYP719A37       | (Pni) |                          | AGTTVVVNLV  | AVHYNPKLWP | EPEQFRPERF | VIGASGGNGG  | GSSEYMLQSY  | LPFGGMRAC  |       |       |       |       |    |       |       |       |       |
| CYP719A26       | (Pme) |                          | AGTTVVVNLV  | AVHYNPKLWP | EPEQFRPERF | VVGASGGNGG  | GSSEYMLQSY  | LPFGGMRSC  |       |       |       |       |    |       |       |       |       |
| CYP719A1        | (Cja) |                          | KGTRIMVNLV  | ALHNNQNIWP | DPYKFMPERF | LEG---ETGT  | AYNKAMEQSF  | LPFSAGMRIC |       |       |       |       |    |       |       |       |       |
| CYP719A5        | (Eca) |                          | KGTSIMVNLV  | AIHNNPKVFP | EPYKFIPERF | LQQG--ESKY  | GDIKEMEQLS  | LPFSAGMRIC |       |       |       |       |    |       |       |       |       |
| pCYP77A2        | (Atr) |                          | EGVNVDFYTP  | SISDDPKLWG | DPERFRPERF | VDKMDGDDDA  | DLTGKVGKVM  | MPFGVGRRIC |       |       |       |       |    |       |       |       |       |
| CYP77A4         | (Ath) |                          | AGVNVVEYLP  | GISEDPRINW | NPKKFDPRDF | MLGKE---DA  | DITGISGVKM  | IPFGVGRRIC |       |       |       |       |    |       |       |       |       |
|                 |       |                          | *           | ..         | :          | ..**        | *           | ::*:*      | *     | ::*:* | *     | ::*:* | :  | ..*   | .     | ::*:* |       |
| binding domain  |       |                          |             |            |            |             |             |            |       |       |       |       |    |       |       |       |       |
| CYP719A37       | (Pni) |                          | AGMEVGKLVQ  | AMVVANLVMS | FKWLPEAEGK | MPDLAEDMTF  | VLMKKPLAA   | KIVPRA--   |       |       |       |       |    |       |       |       |       |
| CYP719A26       | (Pme) |                          | AGMEVGKLVQ  | AMVVANLVMA | FKWLPEEEGK | MPDLAEDMTF  | VLMKKPLAA   | KIVPRA--   |       |       |       |       |    |       |       |       |       |
| CYP719A1        | (Cja) |                          | AGMDLGLKQF  | AFALANLVNA | FKWSCVEEGK | LPDMGELSFS  | VLLMKTPLAA  | RIAGRNV--  |       |       |       |       |    |       |       |       |       |
| CYP719A5        | (Eca) |                          | AGMELGLKQY  | GFSLASLVEA | FKWTCVADGK | LPDLSEDHCF  | ILLMKNPLEA  | RITPRTQL   |       |       |       |       |    |       |       |       |       |
| pCYP77A2        | (Atr) |                          | PGLGLGMLHI  | SIMVATMVQQ | FEWLPNPVAV | RVIDMSEKFEF | TVLMKTPLLA  | IAQPRKK--  |       |       |       |       |    |       |       |       |       |
| CYP77A4         | (Ath) |                          | PGLAMATIHV  | HLMLARMVQE | FEWCAHPGGS | EIDFAGKLEF  | TVVMKNPLRA  | MVKPRI--   |       |       |       |       |    |       |       |       |       |
|                 |       |                          | ::*         | ..         | :          | ..**        | *           | ::*:*      | *     | ::*:* | *     | ::*:* | :  | ..*   | .     | ::*:* |       |

**Figure S4** Amino acid sequence of CYP719A37 (MT643912). Characteristic features and relevant amino acids are shown.
